# Supplementary material
Source: Springer Nature journal article supplement (https://www.springermedizin.de/resource/supplementary/12903_2011_194_MOESM4_ESM.pdf/9516332)

Caries, age 12-19 y  
Smoothed RR

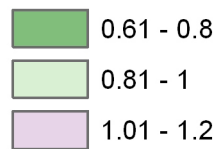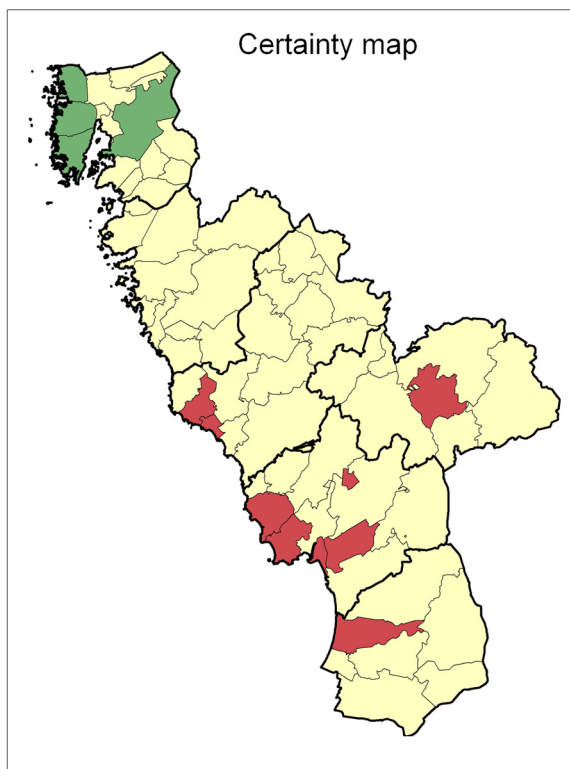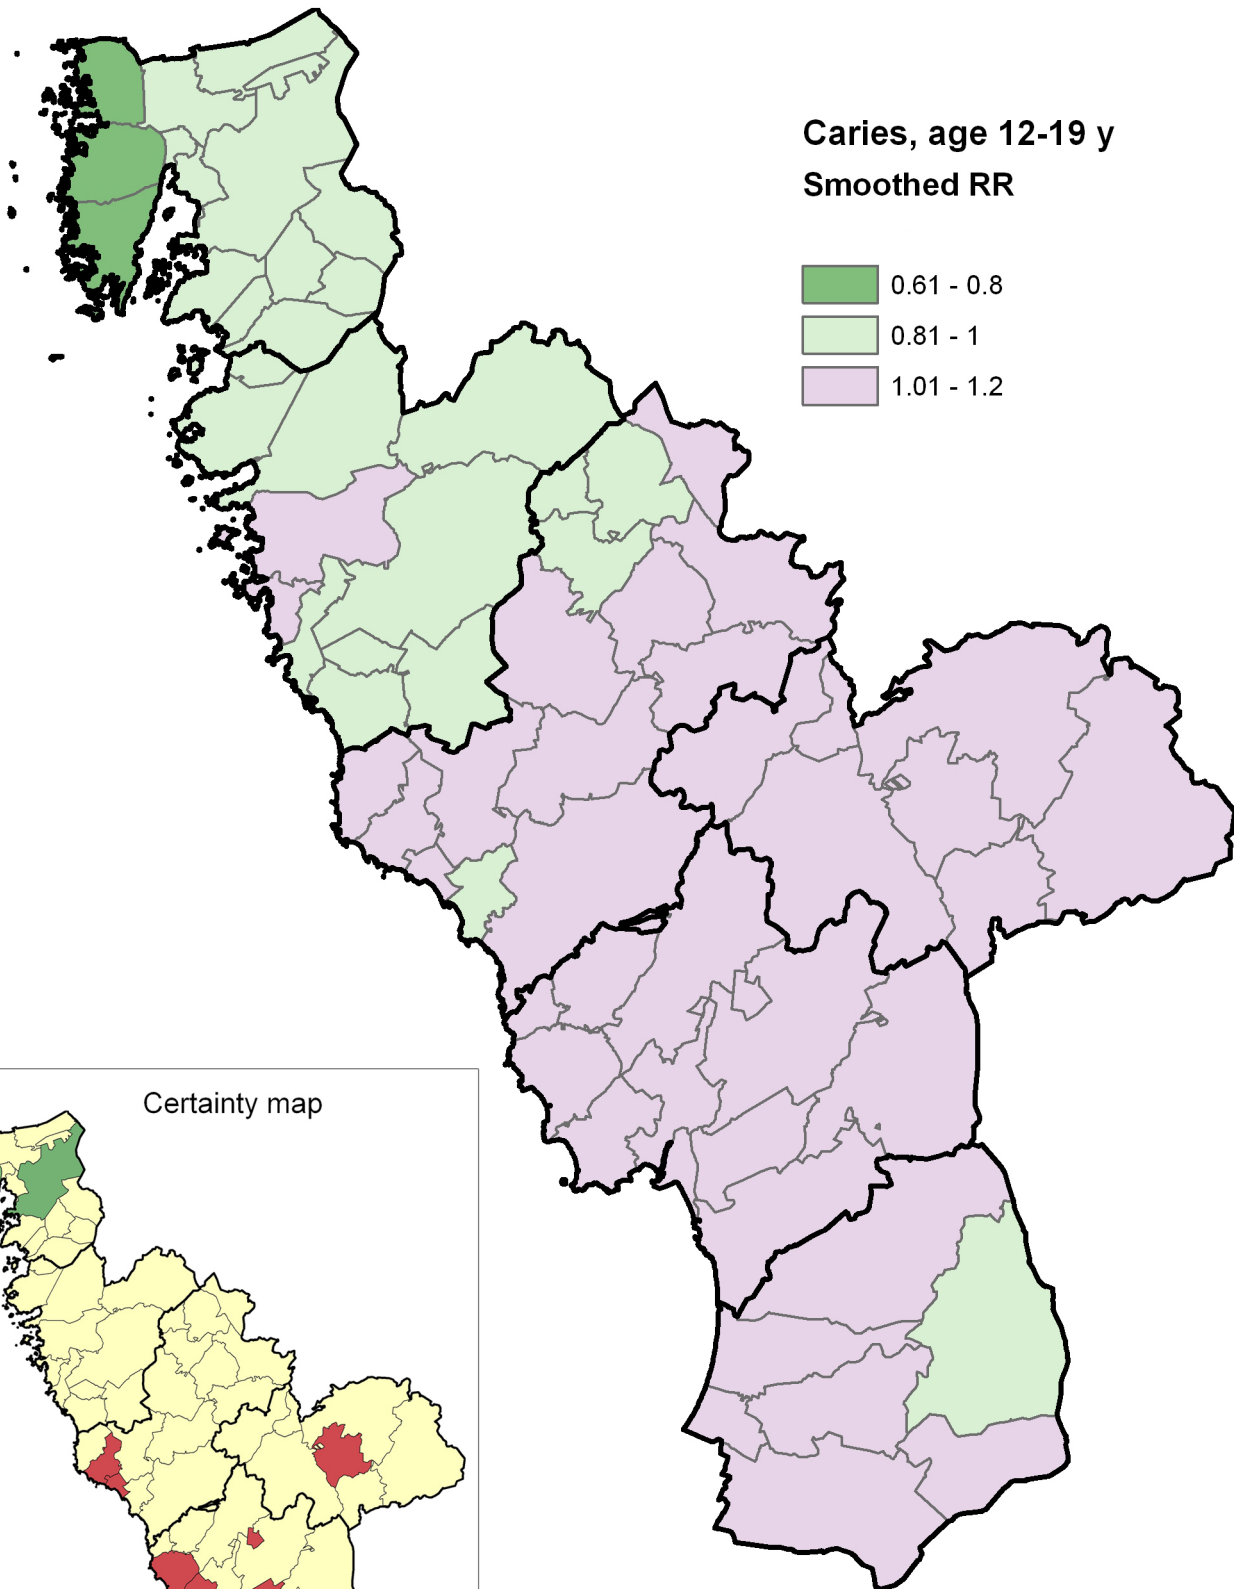

Supplement: MOESM4 [file 9516332]
